# Supplementary material for: A workforce survey of Australian osteopathy: analysis of a nationally-representative sample of osteopaths from the Osteopathy Research and Innovation Network (ORION) project
Source: Springer Nature journal article supplement (doi:10.1186/s12913-018-3158-y), 2018-05-10
Supplement: MOESM1 [file 15754886]

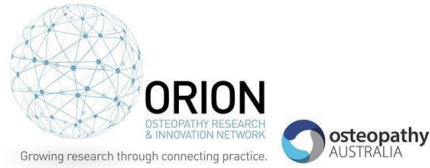

## ORION PRACTITIONER QUESTIONNAIRE

### Osteopathy practitioner characteristics

1) What is your age in years? \_\_\_\_\_

2) What is your gender?

- Male
- Female

3) Are you currently in private osteopathy practice?

- No
- Yes, how many years: \_\_\_\_\_

4) What is the highest level of osteopathy professional qualification that you hold?

- Diploma
- Advanced Diploma
- Bachelor (or Double Bachelor) Degree
- Masters Degree
- PhD
- Other (please specify): \_\_\_\_\_

5) Are you a member of any of the following professional organisations? (select all that apply)

- OA
- CA (formerly COCA)
- SMA
- Other(s) (please specify): \_\_\_\_\_

6) Indicate all the roles in which you have been involved as an osteopath over the last 12 months: (select all that apply)

- University teaching
- Clinical supervision
- Professional organisations
- Private practice
- Research
- Volunteer work
- Other(s) (please specify): \_\_\_\_\_

## Practice characteristics

7) How many of the following would you provide on average, per week?

- a) Patient care hours: \_\_\_\_\_  
b) Patient visits: \_\_\_\_\_

8) Do you practice in more than one location?

- ( ) No  
( ) Yes (how many in total): \_\_\_\_\_

9) Do you work with other health professionals in the same practice location(s)?

- ( ) No  
( ) Yes

**Please indicate all other health professionals working in your practice location(s): (select all that apply)**

- Another Osteopath  
 GP  
 Medical Specialist  
 Podiatrist  
 Physiotherapist  
 Exercise Physiologist  
 Occupational Therapist  
 Psychologist/Counsellor  
 Massage therapist  
 Acupuncturist  
 Naturopath  
 Dietician  
 Nutritionist  
 Other(s) (please specify): \_\_\_\_\_

10) Do you send referrals to other health professionals?

- ( ) No  
( ) Yes

**Please indicate all other health professionals you send referrals: (select all that apply)**

- Another Osteopath  
 GP  
 Medical Specialist  
 Podiatrist  
 Physiotherapist  
 Exercise Physiologist  
 Occupational Therapist  
 Psychologist/Counsellor  
 Massage therapist  
 Acupuncturist  
 Naturopath  
 Dietician  
 Nutritionist

Other(s) (please specify): \_\_\_\_\_

**11) Do you receive referrals from other health professionals?**

No

Yes

**Please indicate all other health professionals you receive referrals: (select all that apply)**

Another Osteopath

GP

Medical Specialist

Podiatrist

Physiotherapist

Exercise Physiologist

Occupational Therapist

Psychologist/Counsellor

Massage therapist

Acupuncturist

Naturopath

Dietician

Nutritionist

Other(s) (please specify): \_\_\_\_\_

**12) In which State/Territory do you practice? (select all that apply)**

NSW

VIC

QLD

WA

SA

TAS

NT

ACT

**13) Which of the following best describes your practice location(s)? (select all that apply)**

Urban

Rural

Remote

**14) How frequently do you refer your patients for diagnostic imaging?**

Never

Rarely

Sometimes

Often

**15) For what reason(s) do you refer your patients for diagnostic imaging? (select all that apply)**

Investigation of unknown pathologies

Investigation of suspected diagnosis

Investigation of potential fractures

- Rule out risk factors prior to treatment
- General screening of the spine
- Other(s) (please specify): \_\_\_\_\_

**16) Which of the following techniques do you use to assist in clinical diagnosis? (select all that apply)**

- Orthopaedic testing
- Clinical assessment algorithm
- Neurological testing
- Screening questionnaire
- Cranial nerve testing
- Other(s) (please specify): \_\_\_\_\_

**17) Indicate when you use electronic records: (select all that apply)**

- Initial history
- Examination findings
- Subsequent patient visits
- Never

**If you do use electronic records, what software do you use? (select all that apply)**

- Cliniko
- Mindbody
- Front desk
- eAlth
- TM2
- Other(s) (please specify): \_\_\_\_\_

**18) How frequently do you share your patient records with the government's eHealth system?**

- Never
- Rarely
- Sometimes
- Often

**19) How frequently do you use a HICAPS terminal?**

- Never
- Rarely
- Sometimes
- Often

**20) How frequently do you use Medicare Easyclaim for chronic disease management patients?**

- Never
- Rarely
- Sometimes
- Often

## Clinical management

21) How frequently do you discuss the following in your care/management plans?

|                                                               | Never | Rarely | Sometimes | Often |
|---------------------------------------------------------------|-------|--------|-----------|-------|
| Diet/Nutrition                                                | ( )   | ( )    | ( )       | ( )   |
| Smoking/Drugs/Alcohol                                         | ( )   | ( )    | ( )       | ( )   |
| Physical activity/Fitness                                     | ( )   | ( )    | ( )       | ( )   |
| Occupational health and safety                                | ( )   | ( )    | ( )       | ( )   |
| Pain counselling                                              | ( )   | ( )    | ( )       | ( )   |
| Stress management                                             | ( )   | ( )    | ( )       | ( )   |
| Nutritional supplements (including vitamins, minerals, herbs) | ( )   | ( )    | ( )       | ( )   |
| Medications (including for pain/inflammation)                 | ( )   | ( )    | ( )       | ( )   |
| Other(s)                                                      | ( )   | ( )    | ( )       | ( )   |

Please specify the "other(s)": \_\_\_\_\_

22) How frequently do you treat patients that present with the following conditions?

|                                                                       | Never | Rarely | Sometimes | Often |
|-----------------------------------------------------------------------|-------|--------|-----------|-------|
| Neck pain                                                             | ( )   | ( )    | ( )       | ( )   |
| Thoracic pain                                                         | ( )   | ( )    | ( )       | ( )   |
| Low back pain                                                         | ( )   | ( )    | ( )       | ( )   |
| Hip musculoskeletal disorders                                         | ( )   | ( )    | ( )       | ( )   |
| Knee musculoskeletal disorders                                        | ( )   | ( )    | ( )       | ( )   |
| Ankle musculoskeletal disorders                                       | ( )   | ( )    | ( )       | ( )   |
| Foot musculoskeletal disorders                                        | ( )   | ( )    | ( )       | ( )   |
| Shoulder musculoskeletal disorders                                    | ( )   | ( )    | ( )       | ( )   |
| Elbow musculoskeletal disorders                                       | ( )   | ( )    | ( )       | ( )   |
| Wrist musculoskeletal disorders                                       | ( )   | ( )    | ( )       | ( )   |
| Hand musculoskeletal disorders                                        | ( )   | ( )    | ( )       | ( )   |
| Postural disorders (including lordosis, thoracic kyphosis, scoliosis) | ( )   | ( )    | ( )       | ( )   |
| Degenerative spine conditions (including spondylolisthesis)           | ( )   | ( )    | ( )       | ( )   |
| Headache disorders (including cervicogenic, tension)                  | ( )   | ( )    | ( )       | ( )   |

|                                         |     |     |     |     |
|-----------------------------------------|-----|-----|-----|-----|
| Migraine disorders                      | ( ) | ( ) | ( ) | ( ) |
| Spinal health maintenance or prevention | ( ) | ( ) | ( ) | ( ) |
| Chronic or persistent pain              | ( ) | ( ) | ( ) | ( ) |
| Tendinopathies                          | ( ) | ( ) | ( ) | ( ) |
| Temporomandibular joint (TMJ) disorders | ( ) | ( ) | ( ) | ( ) |
| Non-musculoskeletal disorder(s)         | ( ) | ( ) | ( ) | ( ) |
| Other                                   | ( ) | ( ) | ( ) | ( ) |

Please specify the "non-musculoskeletal disorder(s)":

\_\_\_\_\_

Please specify the "other":

\_\_\_\_\_

23) How frequently do you treat the following patient subgroups?

|                                                                                                         | Never | Rarely | Sometimes | Often |
|---------------------------------------------------------------------------------------------------------|-------|--------|-----------|-------|
| Children (up to 3 years)                                                                                | ( )   | ( )    | ( )       | ( )   |
| Children (4 to 18 years)                                                                                | ( )   | ( )    | ( )       | ( )   |
| Older people (65 years or over)                                                                         | ( )   | ( )    | ( )       | ( )   |
| Aboriginal and Torres Strait Islander people                                                            | ( )   | ( )    | ( )       | ( )   |
| Pregnant women                                                                                          | ( )   | ( )    | ( )       | ( )   |
| People with sports-related injuries                                                                     | ( )   | ( )    | ( )       | ( )   |
| People with work-related injuries (covered by Workers' Compensation Scheme)                             | ( )   | ( )    | ( )       | ( )   |
| People with work-related injuries ( <i>not</i> covered by Workers' Compensation Scheme)                 | ( )   | ( )    | ( )       | ( )   |
| People with traffic-related injuries (covered by MAA/SIRA, TAC, MAIC, MAC, ICWA, MAIB, TIO)             | ( )   | ( )    | ( )       | ( )   |
| People with traffic-related injuries ( <i>not</i> covered by MAA/SIRA, TAC, MAIC, MAC, ICWA, MAIB, TIO) | ( )   | ( )    | ( )       | ( )   |
| People receiving post-surgical rehabilitation                                                           | ( )   | ( )    | ( )       | ( )   |
| Non-English speaking ethnic group(s)                                                                    | ( )   | ( )    | ( )       | ( )   |

|       |     |     |     |     |
|-------|-----|-----|-----|-----|
| Other | ( ) | ( ) | ( ) | ( ) |
|-------|-----|-----|-----|-----|

Please specify the "non-English speaking ethnic group(s)":

---

Please specify the "other":

---

**24) How frequently do you employ the following Techniques/Methods in your patient management?**

|                                                           | Never | Rarely | Sometimes | Often |
|-----------------------------------------------------------|-------|--------|-----------|-------|
| Strain/Counterstrain                                      | ( )   | ( )    | ( )       | ( )   |
| Muscle energy techniques                                  | ( )   | ( )    | ( )       | ( )   |
| HVLA (high velocity low amplitude)/Spinal manipulation    | ( )   | ( )    | ( )       | ( )   |
| Peripheral joint manipulation                             | ( )   | ( )    | ( )       | ( )   |
| Soft tissue                                               | ( )   | ( )    | ( )       | ( )   |
| Myofascial release                                        | ( )   | ( )    | ( )       | ( )   |
| Cranial techniques                                        | ( )   | ( )    | ( )       | ( )   |
| Facilitated positional release                            | ( )   | ( )    | ( )       | ( )   |
| Needling techniques (eg. dry needling, acupuncture)       | ( )   | ( )    | ( )       | ( )   |
| Visceral techniques                                       | ( )   | ( )    | ( )       | ( )   |
| Lymphatic pump                                            | ( )   | ( )    | ( )       | ( )   |
| Autonomic balancing                                       | ( )   | ( )    | ( )       | ( )   |
| Biodynamic techniques                                     | ( )   | ( )    | ( )       | ( )   |
| Functional techniques                                     | ( )   | ( )    | ( )       | ( )   |
| Balanced ligamentous tension/Ligamentous articular strain | ( )   | ( )    | ( )       | ( )   |
| Exercise prescription                                     | ( )   | ( )    | ( )       | ( )   |
| Chapmans reflexes                                         | ( )   | ( )    | ( )       | ( )   |
| Shockwave therapy                                         | ( )   | ( )    | ( )       | ( )   |
| Ultrasound therapy                                        | ( )   | ( )    | ( )       | ( )   |
| TENS or other electrotherapy                              | ( )   | ( )    | ( )       | ( )   |
| Instrument-assisted manipulative techniques               | ( )   | ( )    | ( )       | ( )   |
| Instrument-assisted soft tissue mobilisation              | ( )   | ( )    | ( )       | ( )   |

|                              |                       |                       |                       |                       |
|------------------------------|-----------------------|-----------------------|-----------------------|-----------------------|
| Trigger point therapy        | <input type="radio"/> | <input type="radio"/> | <input type="radio"/> | <input type="radio"/> |
| Sports taping                | <input type="radio"/> | <input type="radio"/> | <input type="radio"/> | <input type="radio"/> |
| Other technique(s)/Method(s) | <input type="radio"/> | <input type="radio"/> | <input type="radio"/> | <input type="radio"/> |

Please specify the "other technique(s)/method(s)":

---

**25) Do you think osteopathy practice should include the following aspects in the future?**

|                                                          | No                    | Unsure                | Maybe                 | Definitely            |
|----------------------------------------------------------|-----------------------|-----------------------|-----------------------|-----------------------|
| Prescribing rights                                       | <input type="radio"/> | <input type="radio"/> | <input type="radio"/> | <input type="radio"/> |
| Expanded referral rights to an Orthopaedic Surgeon       | <input type="radio"/> | <input type="radio"/> | <input type="radio"/> | <input type="radio"/> |
| Expanded referral rights to a Paediatrician              | <input type="radio"/> | <input type="radio"/> | <input type="radio"/> | <input type="radio"/> |
| Expanded referral rights to a Sports Medicine Specialist | <input type="radio"/> | <input type="radio"/> | <input type="radio"/> | <input type="radio"/> |
| Expanded referral rights to a Rheumatologist             | <input type="radio"/> | <input type="radio"/> | <input type="radio"/> | <input type="radio"/> |
| Expanded referral rights to other Medical Specialists    | <input type="radio"/> | <input type="radio"/> | <input type="radio"/> | <input type="radio"/> |
| Expanded diagnostic imaging rights                       | <input type="radio"/> | <input type="radio"/> | <input type="radio"/> | <input type="radio"/> |

## Research

**26) To what extent do you agree or disagree with the following statements?**

**a) Research is useful to help patients understand the benefits of osteopathy for their health.**

- Strongly Disagree
- Disagree
- Neutral
- Agree
- Strongly Agree

**b) Research is useful to help GPs and other conventional health professionals understand the role of osteopathy in health care.**

- Strongly Disagree
- Disagree
- Neutral
- Agree
- Strongly Agree



**c) Research is useful to provide scientific evidence for what I do as an osteopath.**

- Strongly Disagree
- Disagree
- Neutral
- Agree
- Strongly Agree

**d) Research is irrelevant to the professional development of osteopathy in Australia.**

- Strongly Disagree
- Disagree
- Neutral
- Agree
- Strongly Agree

**27) What impact does evidence from research have on your current practice?**

- No impact at all
- Minimal impact
- Moderate impact
- High impact
